# Supplementary material for: Boosting the performance and durability of Ni/YSZ cathode for hydrogen production at high current densities via decoration with nano-sized electrocatalysts
Source: Royal Society of Chemistry journal article supplement (doi:10.1039/c8nr07678b), 2019-01-01
Supplement: c8nr07678b1.pdf [file c8nr07678b1.pdf]

**Supporting information:**

**Boosting performance and durability of Ni/YSZ cathode via decoration with ultrafine CGO electro-catalyst for hydrogen production at high current densities**

Simona Ovtar, Xiaofeng Tong, Janet J. Bentzen, Karl T. S. Thydén, Søren Bredmose Simonsen, Ming Chen\*

Department of Energy Conversion and Storage, Technical University of Denmark, Frederiksborgvej 399, DK-4000 Roskilde, Denmark

\* Corresponding author

**Initial characterizations:**

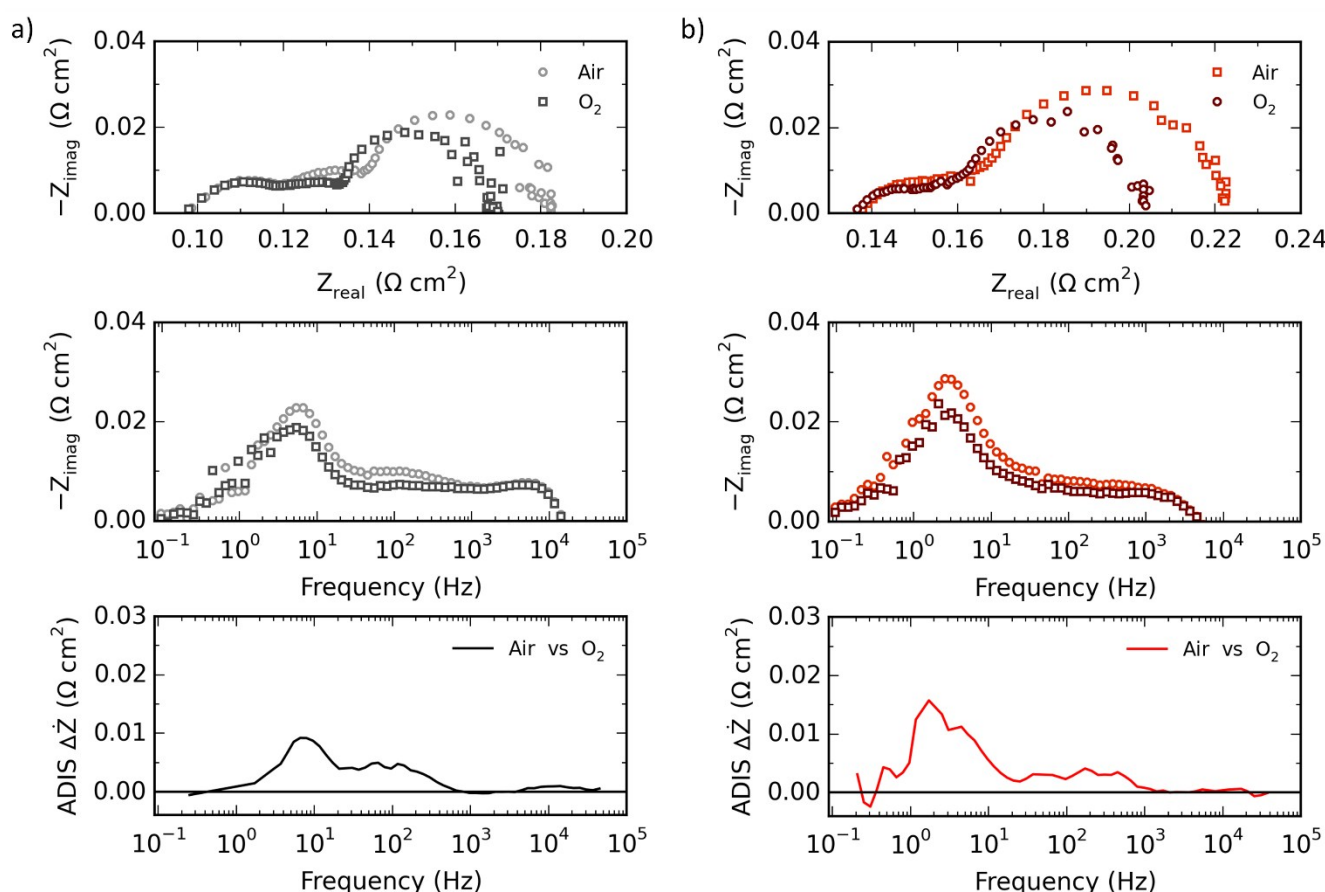

Figure S1: EIS of a) Cell A, and b) Cell B1 for oxygen electrode gas shift with corresponding ADIS plot where EIS measured by applying air was taken as a reference.

## Durability tests:

Table S1: Cell voltages and resistances measured during the long-term durability test for Cell A with the bare Ni/YSZ electrode and Cell B1 with the CGO infiltrated Ni/YSZ electrode.

|                                 | Cell A |       |       | Cell B1 |       |       |
|---------------------------------|--------|-------|-------|---------|-------|-------|
| Time (h)                        | 0      | 60    | 750   | 0       | 500   | 1000  |
| Voltage (V)                     | 1.265  | 1.365 | 1.789 | 1.218   | 1.251 | 1.332 |
| $R_s$ ( $m\Omega\text{ cm}^2$ ) | 77.4   | 100.6 | 368.0 | 130.5   | 121.0 | 125.7 |
| $R_p$ ( $m\Omega\text{ cm}^2$ ) | 383.7  | 407.8 | 439.8 | 208.0   | 268.0 | 431.7 |

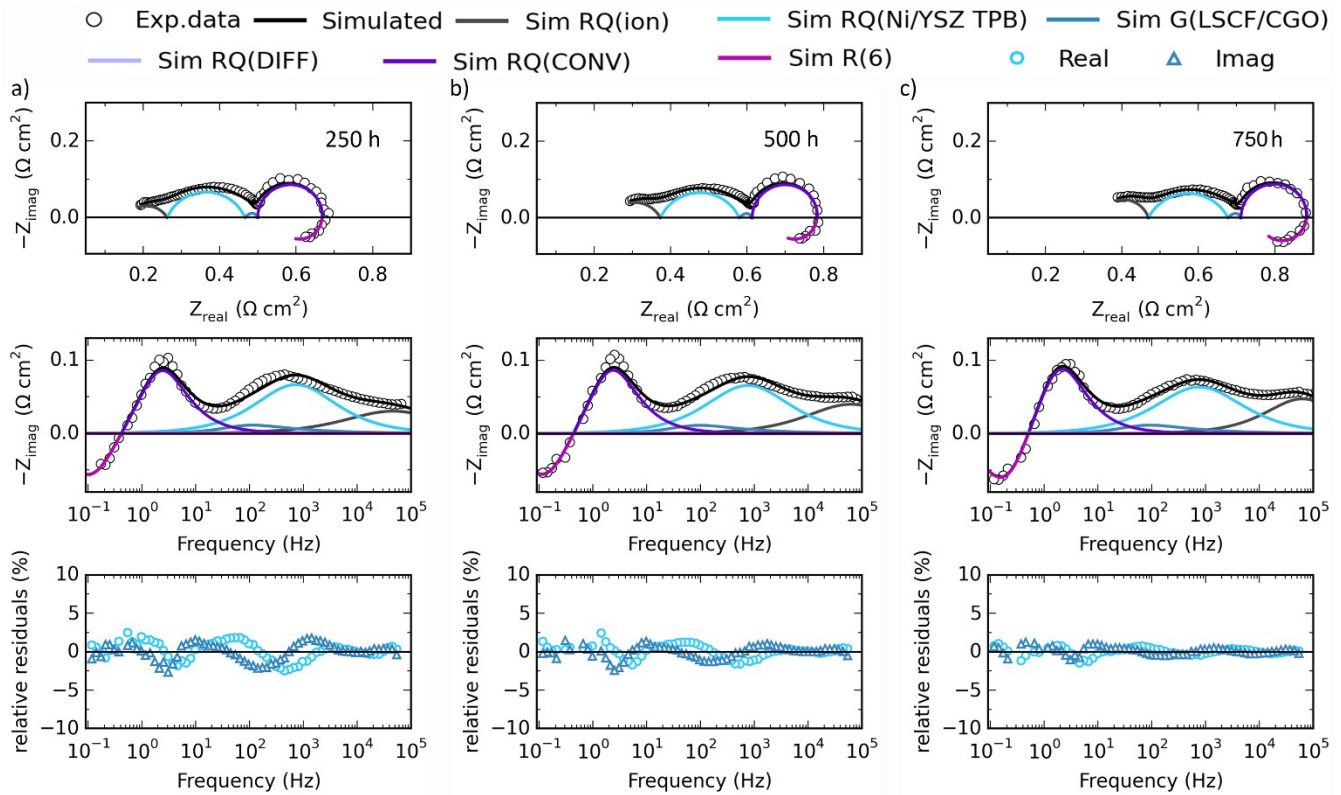

Figure S2: Results of fitting equivalent circuit models to the impedance spectra for Cell A during long-term steam electrolysis at  $-1.25\text{ A/cm}^2$ ,  $800\text{ }^\circ\text{C}$  and 70% steam conversion: a) 250h, b) 500h, and c) 750h

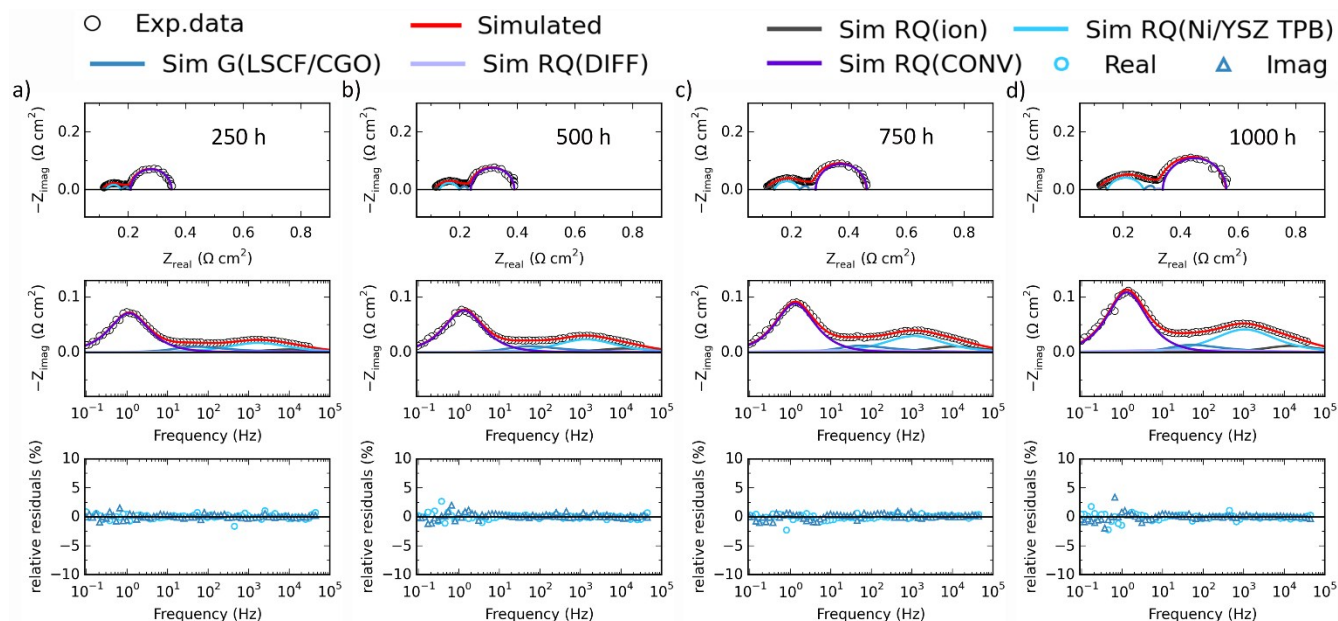

Figure S3: Results of fitting equivalent circuit models to the impedance spectra for Cell B1 during long-term steam electrolysis at  $-1.25 \text{ A/cm}^2$ ,  $800^\circ\text{C}$  and 70% steam conversion: a) 250h, b) 500h, c) 750h, and d) 1000h

Table S2: Results of fitting equivalent circuit models to the impedance spectra for Cell A and Cell B1 during long-term steam electrolysis at  $-1.25 \text{ A/cm}^2$ ,  $800^\circ\text{C}$  and 70% steam conversion (results from Figure S2 and Figure S3). The estimated uncertainty for the simulated resistances is  $\sim \pm 7 \text{ m}\Omega \text{ cm}^2$ .

| R ( $\Omega \text{ cm}^2$ ) | Cell A |       |       |       | Cell B1 |       |       |       |       |
|-----------------------------|--------|-------|-------|-------|---------|-------|-------|-------|-------|
|                             | 0h     | 250h  | 500h  | 750h  | 0h      | 250h  | 500h  | 750h  | 1000h |
| $R_s$                       | 0.067  | 0.154 | 0.240 | 0.338 | 0.117   | 0.111 | 0.110 | 0.113 | 0.113 |
| $R_{\text{ion}}$            | 0.013  | 0.109 | 0.132 | 0.132 | 0.009   | 0.014 | 0.019 | 0.029 | 0.031 |
| $R_{\text{Ni/YSZ TPB}}$     | 0.187  | 0.203 | 0.206 | 0.208 | 0.038   | 0.051 | 0.069 | 0.088 | 0.128 |
| $R_{\text{LSCF/CGO}}$       | 0.026  | 0.031 | 0.031 | 0.032 | 0.027   | 0.028 | 0.031 | 0.034 | 0.038 |
| $R_{\text{DIFF}}$           | 0.003  | 0.002 | 0.003 | 0.002 | 0.006   | 0.006 | 0.010 | 0.023 | 0.027 |
| $R_{\text{CONV}}$           | 0.164  | 0.171 | 0.173 | 0.176 | 0.145   | 0.147 | 0.151 | 0.179 | 0.219 |
| $R_p$                       | 0.393  | 0.516 | 0.545 | 0.550 | 0.225   | 0.246 | 0.280 | 0.353 | 0.443 |

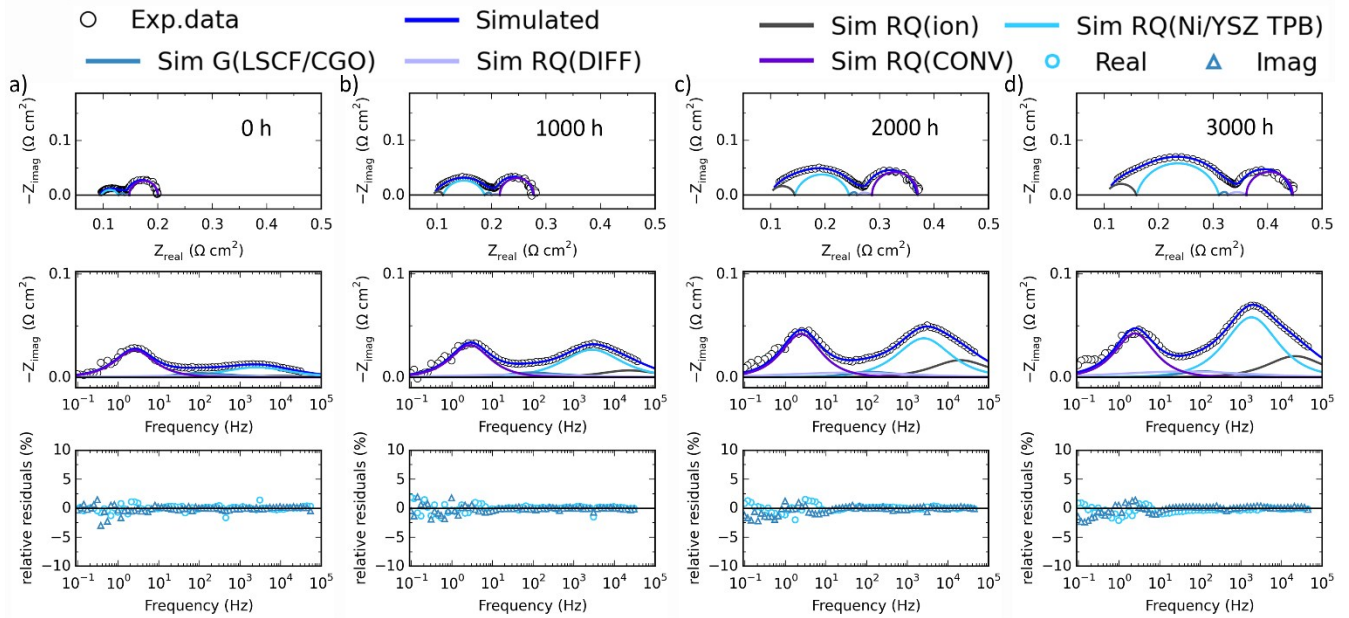

Figure S4: Results of fitting equivalent circuit models to the impedance spectra for Cell B2 during long-term test under  $-1.25 \text{ A/cm}^2$  (11test104) a) 0 h and b) 1000 h, c) 2000 h, d) 3000 h (under  $-1.25 \text{ A/cm}^2$ )

Table S3: Results of fitting equivalent circuit models to the impedance spectra for Cell B2 during long-term steam electrolysis at  $-1.25 \text{ A/cm}^2$ ,  $800^\circ\text{C}$  and 42% steam conversion (results from Figure S4). The estimated uncertainty for the simulated resistances is  $\sim \pm 6 \text{ m}\Omega \text{ cm}^2$ .

| R ( $\Omega \text{ cm}^2$ ) | Cell B2 |       |       |       |       |       |       |
|-----------------------------|---------|-------|-------|-------|-------|-------|-------|
|                             | 0h      | 250h  | 500h  | 750h  | 1000h | 2000h | 3000h |
| $R_s$                       | 0.093   | 0.089 | 0.090 | 0.091 | 0.093 | 0.099 | 0.103 |
| $R_{\text{ion}}$            | 0.004   | 0.005 | 0.010 | 0.015 | 0.018 | 0.045 | 0.056 |
| $R_{\text{Ni/YSZ TPB}}$     | 0.032   | 0.044 | 0.050 | 0.060 | 0.076 | 0.100 | 0.151 |
| $R_{\text{LSCF/CGO}}$       | 0.011   | 0.012 | 0.013 | 0.013 | 0.013 | 0.015 | 0.016 |
| $R_{\text{DIFF}}$           | 0.009   | 0.012 | 0.013 | 0.015 | 0.015 | 0.027 | 0.034 |
| $R_{\text{CONV}}$           | 0.053   | 0.051 | 0.052 | 0.055 | 0.062 | 0.084 | 0.085 |
| $R_p$                       | 0.109   | 0.124 | 0.138 | 0.158 | 0.184 | 0.271 | 0.342 |

**Microstructure of reference cells:**

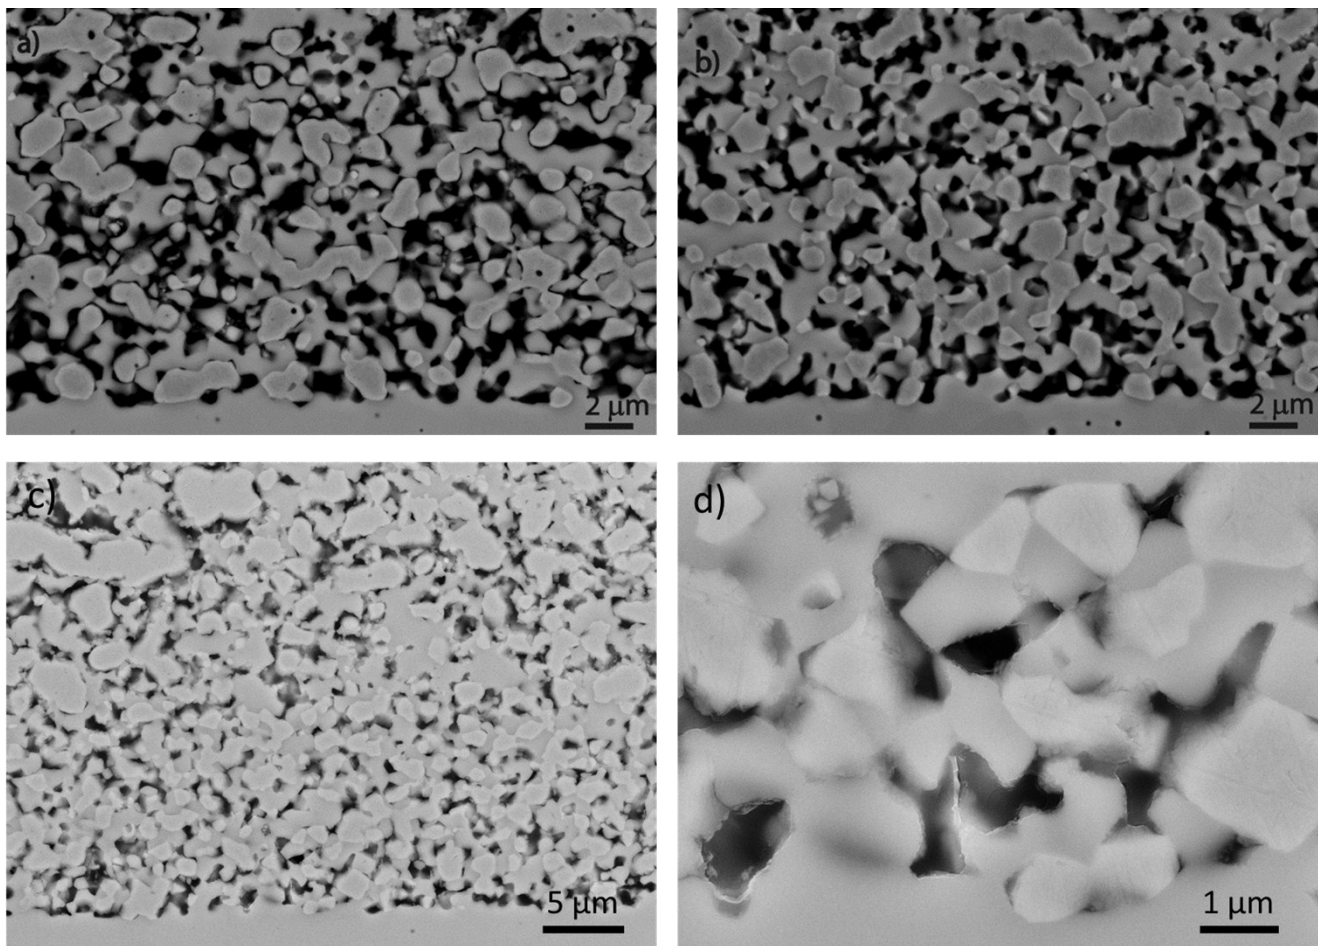

*Figure S5: a) Microstructure of Cell A after long term electrolysis test, b) Microstructure of polished cross-section of reduced Ni/YSZ backbone or a cell after short test. (c,d) Microstructure of Cell B1 after long term electrolysis test.*

Parallel study on CGO particles growth in reducing atmosphere:

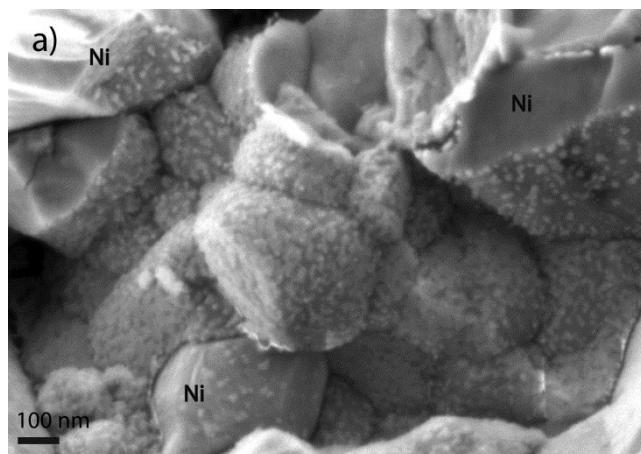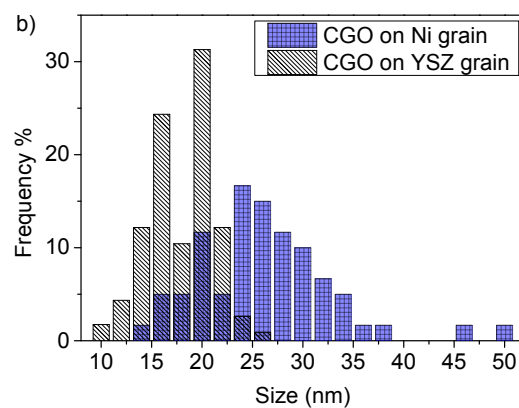

Figure S6: a) Microstructure of CGO infiltrated particles after 600 h at 550 °C in wet  $H_2/N_2$  atmosphere, b) with particles size distribution measured from more than 100 CGO particles on the Ni grains and on the YSZ grains.
